# Supplementary material for: Surface-Active Ionic Liquids and Surface-Active Quaternary Ammonium Salts from Synthesis, Characterization to Antimicrobial Properties
Source: MDPI journal article supplement (doi:10.3390/molecules29020443), 2024-01-16
Supplement: s1 [file s1]

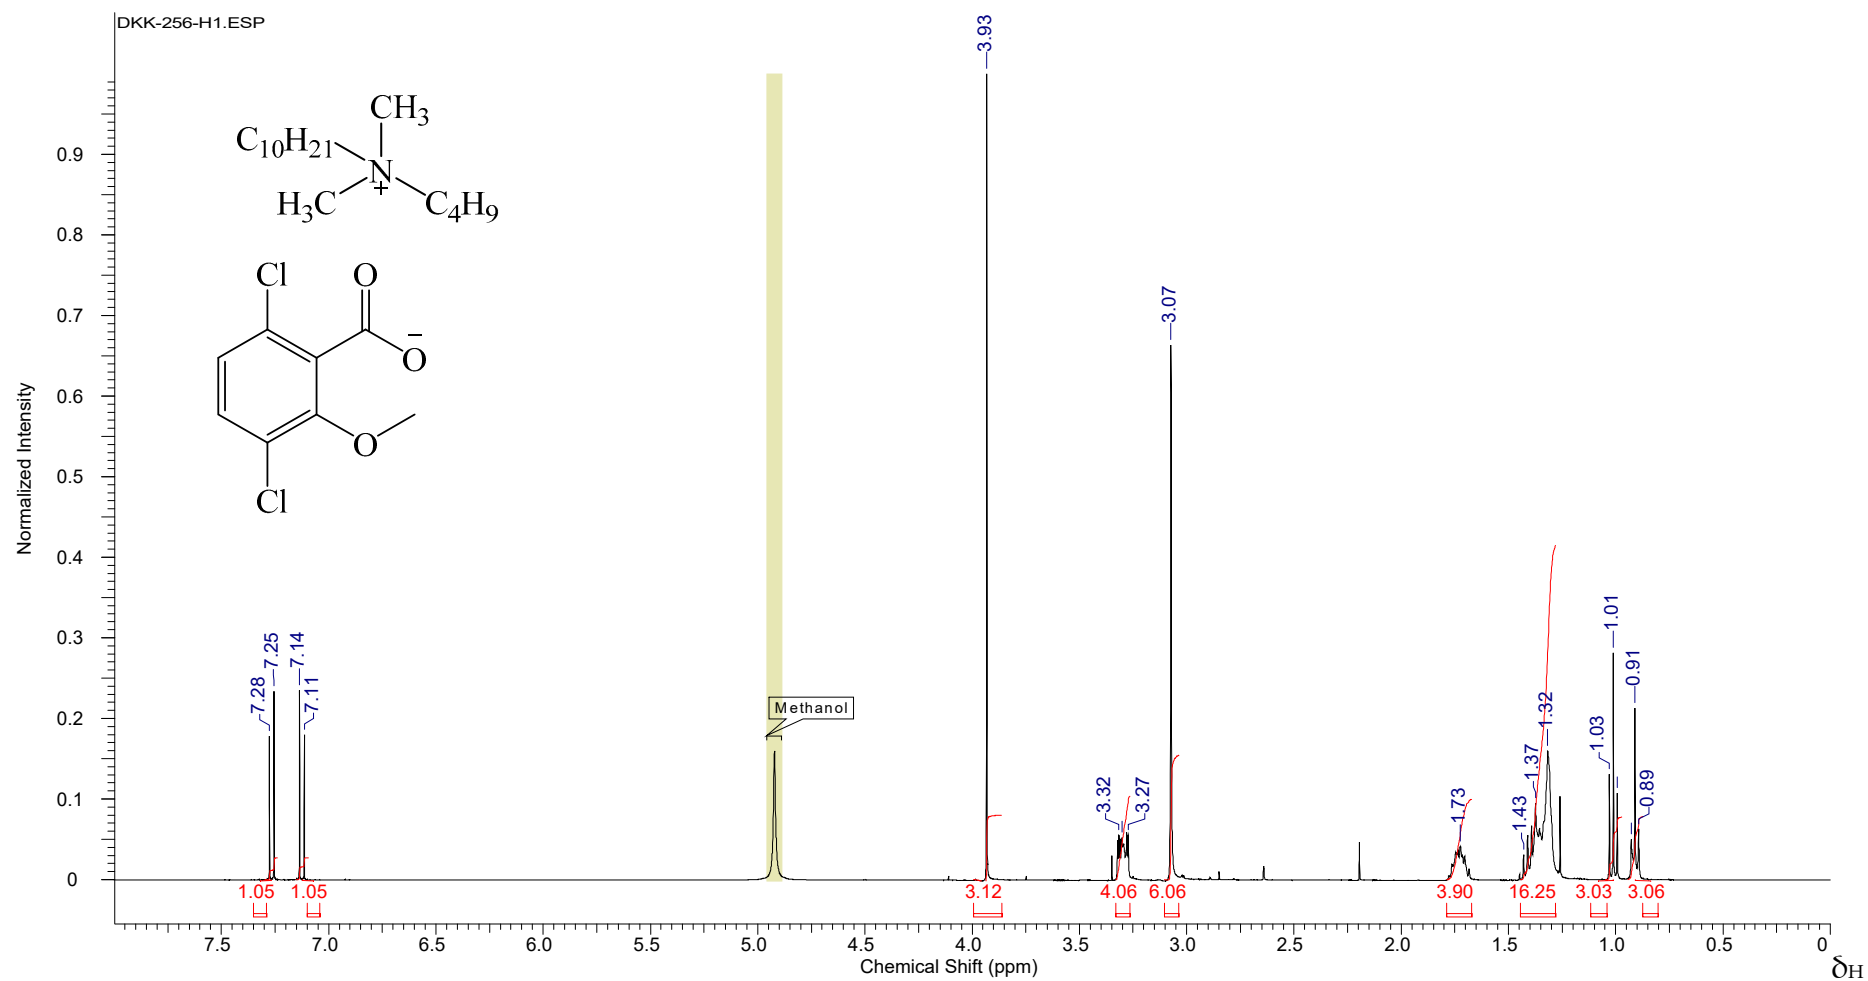

(METHANOL- $d_4$ ): 7.28 (1H, d,  $J=9$  Hz), 7.14 (1H, d,  $J=9$  Hz), 3.93 (3H, s), 3.27 - 3.32 (4H, m), 3.07 (6H, s), 1.73 (4H, m), 1.32 - 1.43 (16H, m), 0.99 - 1.03 (3H, m), 0.89 - 0.93 (3H, m).

**Figure S1.**  $^1\text{H}$  NMR spectrum of butyldecyldimethylammonium (3,6-dichloro-2-methoxy)benzoate (**1**)

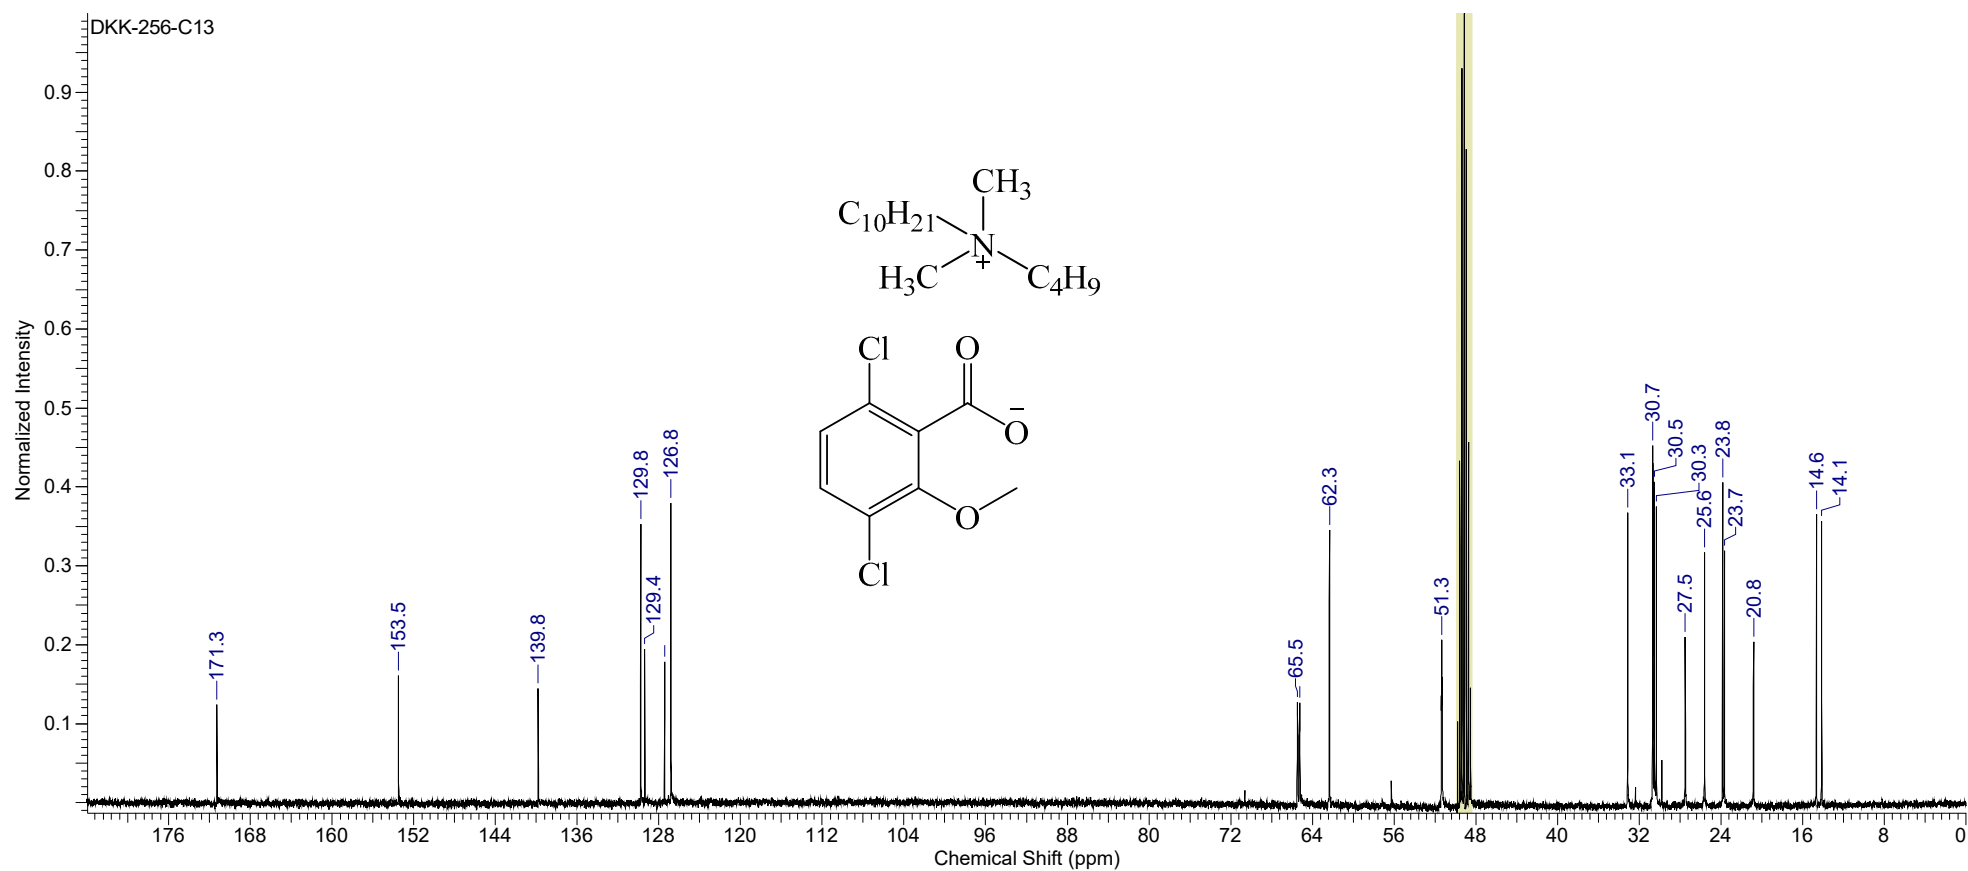

$\delta_c$  (METHANOL- $d_4$ ): 171.3, 153.5, 139.8, 129.8, 129.4, 127.4, 126.8, 65.5, 65.2, 62.3, 51.3 (2C), 33.1, 30.7, 30.7, 30.5, 30.3, 27.5, 25.6, 23.8, 23.7, 20.8, 14.6, 14.1.

**Figure S2.**  $^{13}\text{C}$  NMR spectrum of butyldecyldimethylammonium (3,6-dichloro-2-methoxy)benzoate (**1**)



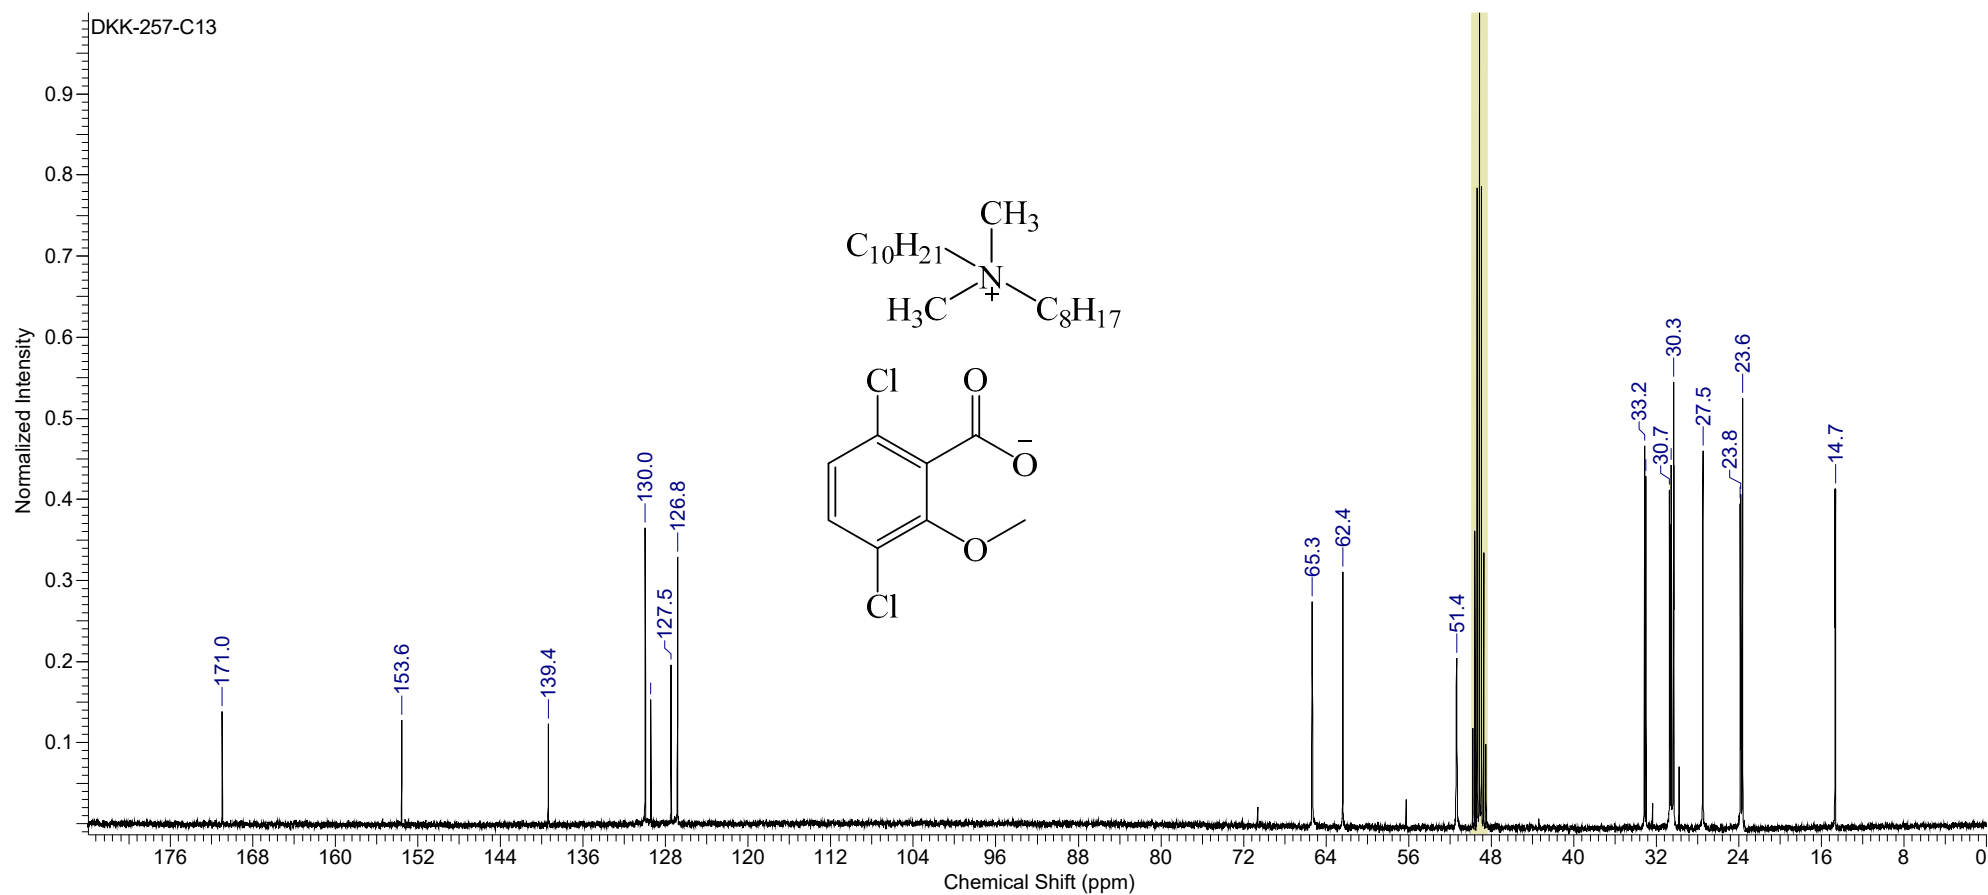

$\delta_c$  (METHANOL- $d_4$ ): 171.0, 153.6, 139.4, 130.0, 129.4, 127.5, 126.8, 65.3 (2C), 62.4, 51.3 (2C), 33.2 (2C), 30.7, 30.5, 30.3 (2C), 30.3 (2C), 27.5 (2C), 23.8 (2C), 23.6 (2C), 14.7 (2C).

**Figure S4.**  $^{13}\text{C}$  NMR spectrum of octyldecyldimethylammonium (3,6-dichloro-2-methoxy)benzoate (**2**)

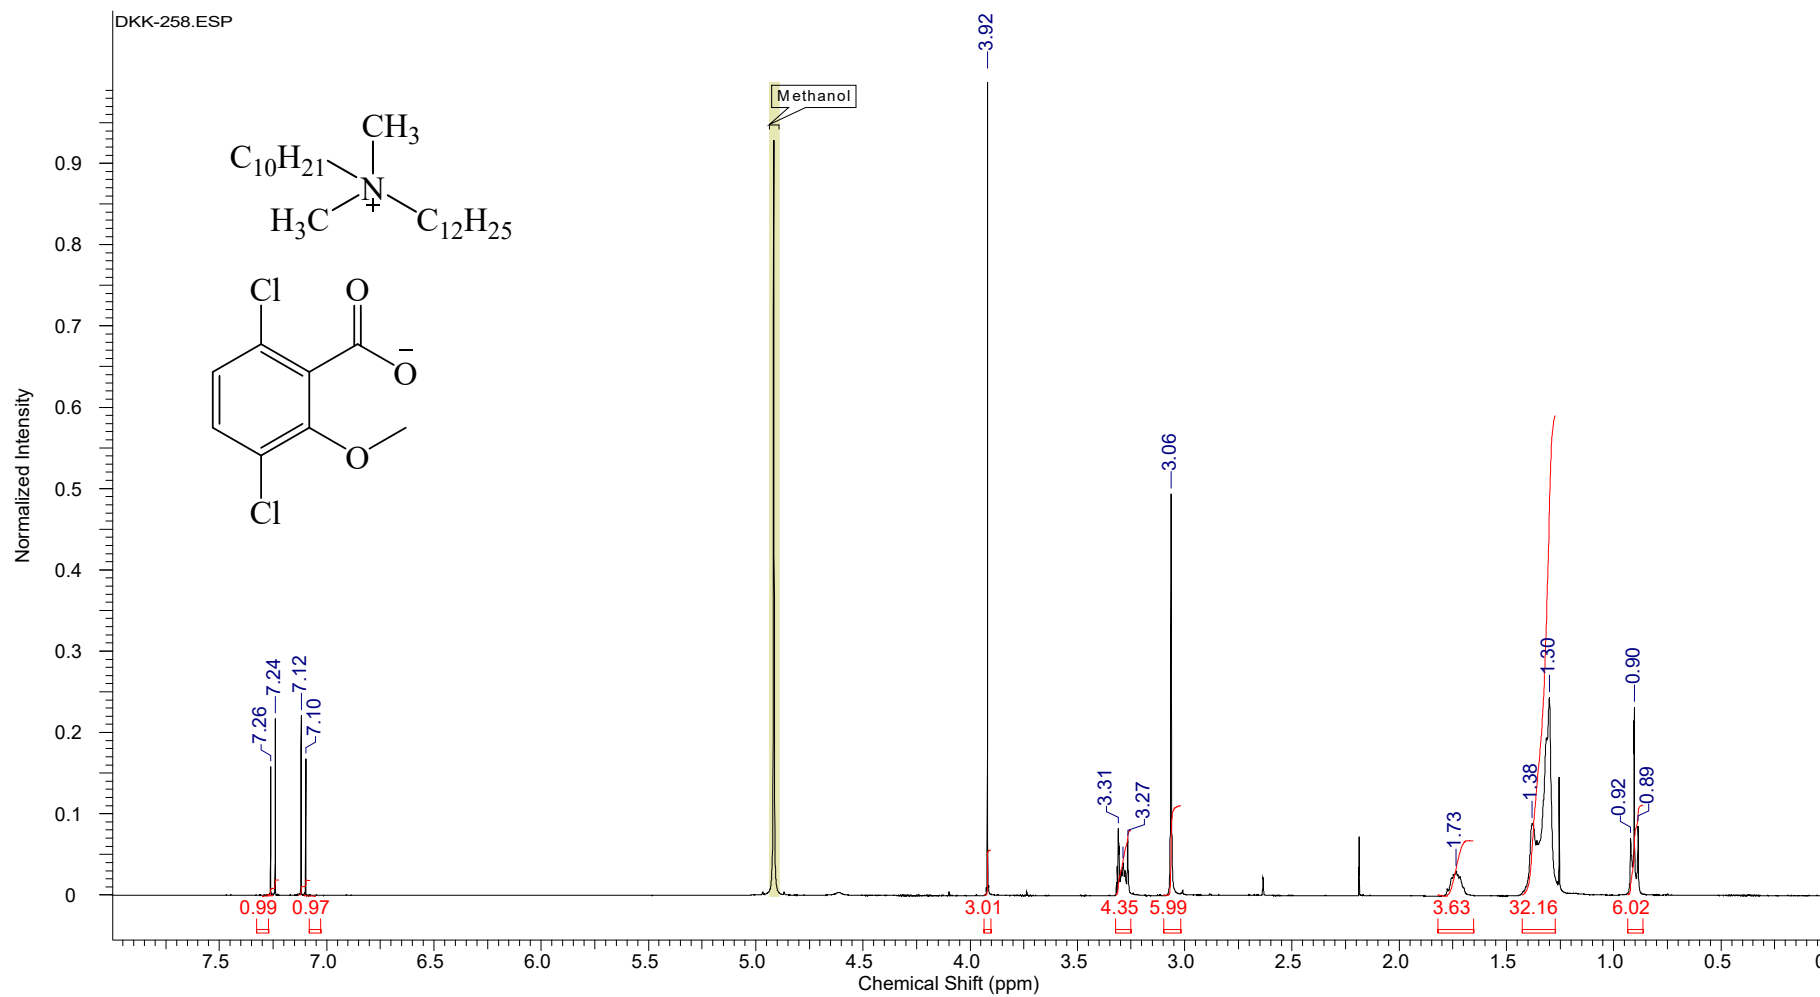

$\delta_{\text{H}}$  (METHANOL- $d_4$ ): 7.26 (1H, d,  $J=9$  Hz), 7.12 (1H, d,  $J=9$  Hz), 3.92 (3H, s), 3.27 - 3.31 (4H, m), 3.06 (6H, s), 1.73 (4H, m), 1.30 - 1.38 (32H, m), 0.89 - 0.92 (6H, m).

**Figure S5.**  $^1\text{H}$  NMR spectrum of dodecyldecyldimethylammonium (3,6-dichloro-2-methoxy)benzoate (**3**)

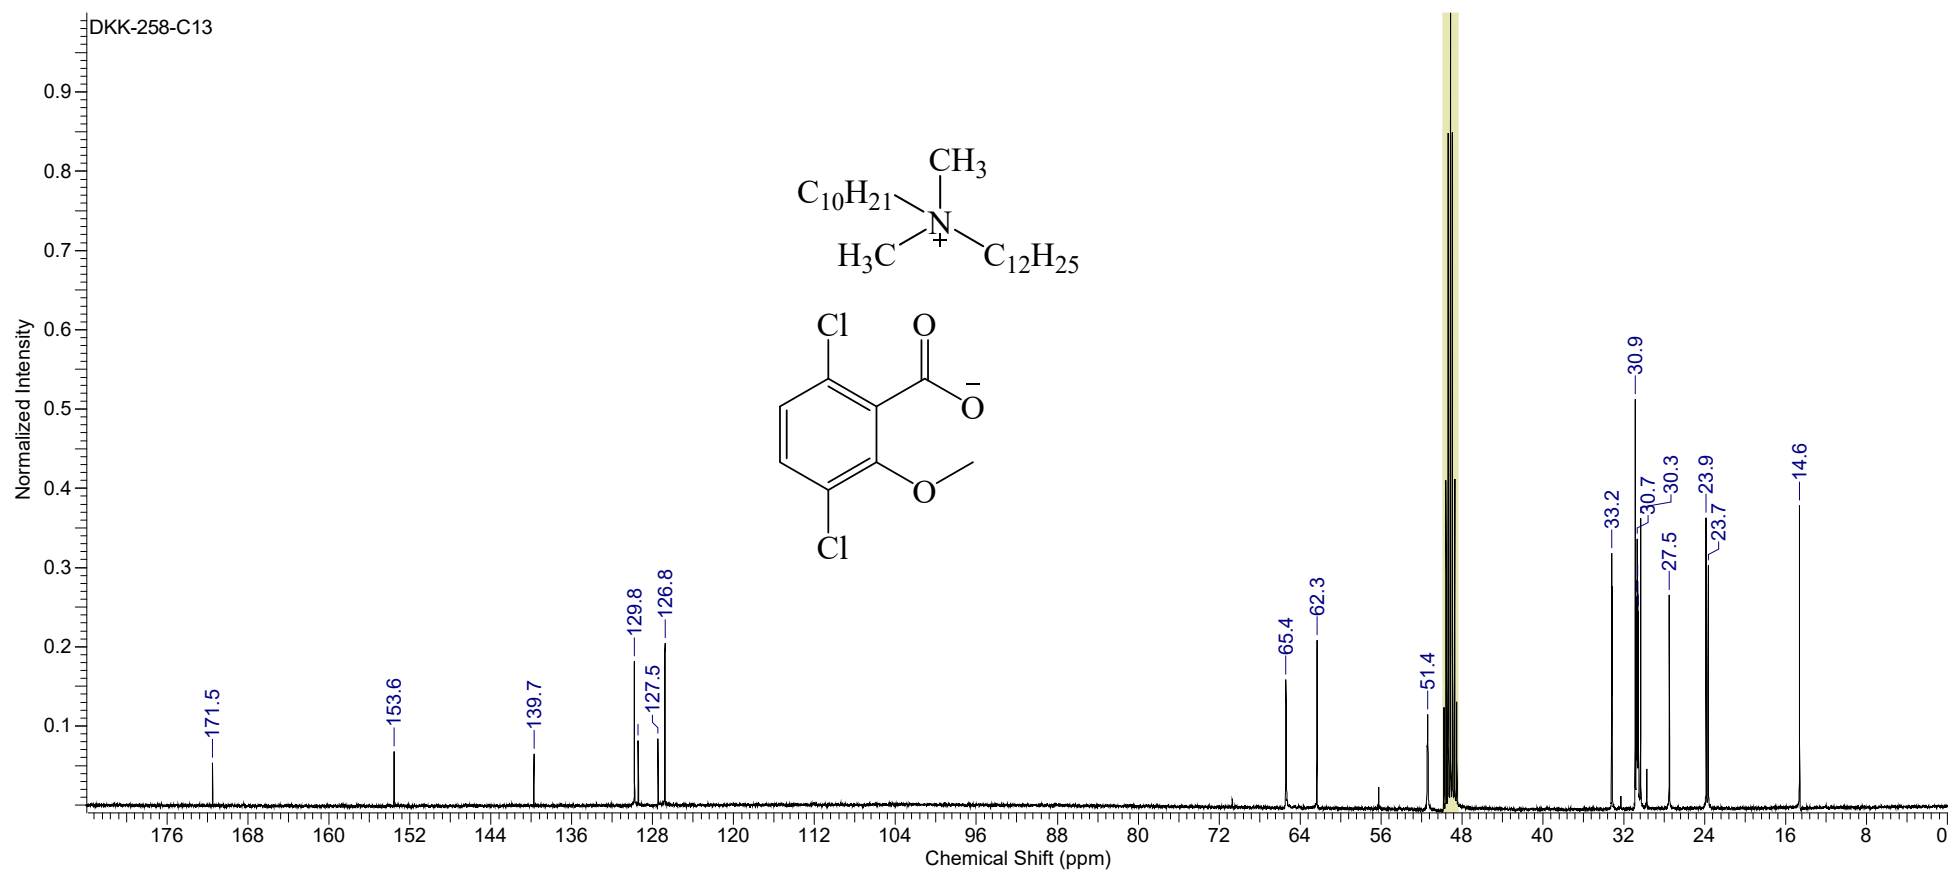

$\delta_c$  (METHANOL- $d_4$ ): 171.5, 153.6, 139.7, 129.8, 129.4, 127.5, 126.8, 65.4 (2C), 62.3, 51.4 (2C), 33.2 (2C), 30.9 (2C), 30.7 (2C), 30.6 (4C), 30.3 (2C), 27.5 (2C), 23.9 (2C), 23.7 (2C), 14.6 (2C).

**Figure S6.**  $^{13}\text{C}$  NMR spectrum of dodecyldecyldimethylammonium (3,6-dichloro-2-methoxy)benzoate (**3**)

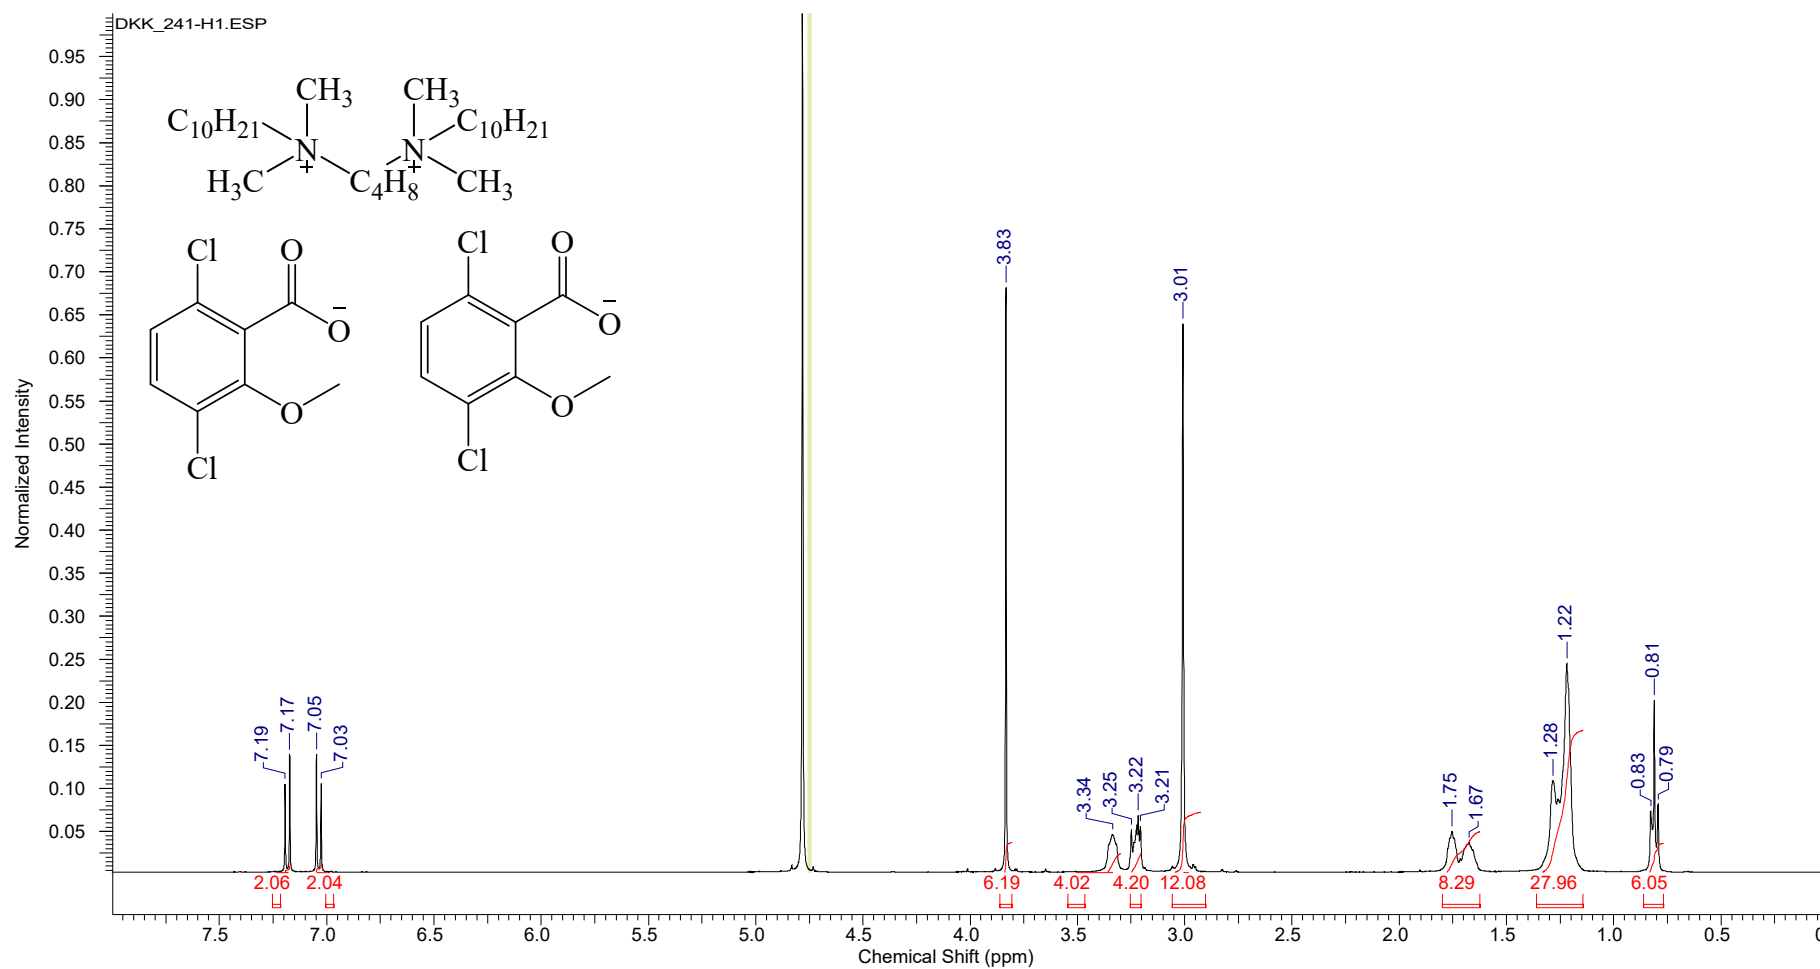

$\delta_{\text{H}}$  (METHANOL- $\text{d}_4$ ): 7.19 (2H, d,  $J=9$  Hz), 7.05 (2H, d,  $J=9$  Hz), 3.83 (6H, s), 3.34 (4H, br. s.), 3.21 - 3.25 (4H, m), 3.01 (12H, s), 1.67 - 1.75 (8H, m), 1.22 - 1.28 (28H, m), 0.79 - 0.83 (6H, m).

**Figure S7.**  $^1\text{H}$  NMR spectrum of tetramethylene-1,4-(decyldimethylammonium) di[(3,6-dichloro-2-methoxy)benzoate] (**4**)

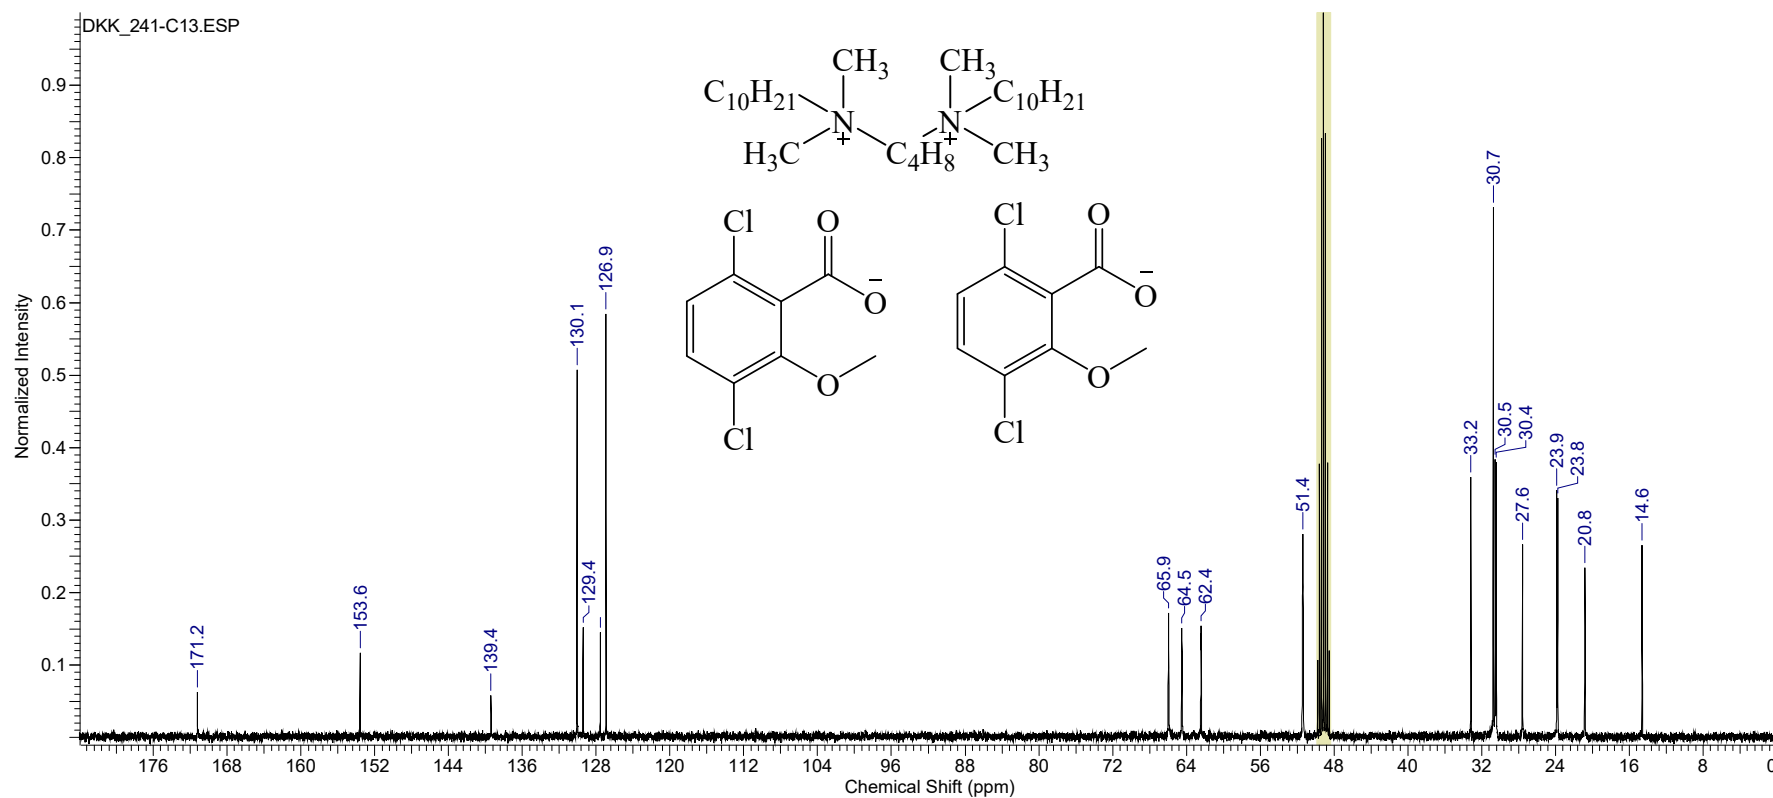

$\delta_c$  (METHANOL- $d_4$ ): 171.2 (2C), 153.6 (2C), 139.4 (2C), 130.1 (2C), 129.4 (2C), 127.5 (2C), 126.9 (2C), 65.9 (2C), 64.5 (2C), 62.4 (2C), 51.4 (4C), 33.2 (2C), 30.7 (2C), 30.5 (2C), 30.4 (4C), 27.6 (2C), 23.9 (2C), 23.8 (2C), 20.8 (2C), 14.6 (2C).

**Figure S8.**  $^{13}\text{C}$  NMR spectrum of tetramethylene-1,4-(decyldimethylammonium) di[(3,6-dichloro-2-methoxy)benzoate] (4)



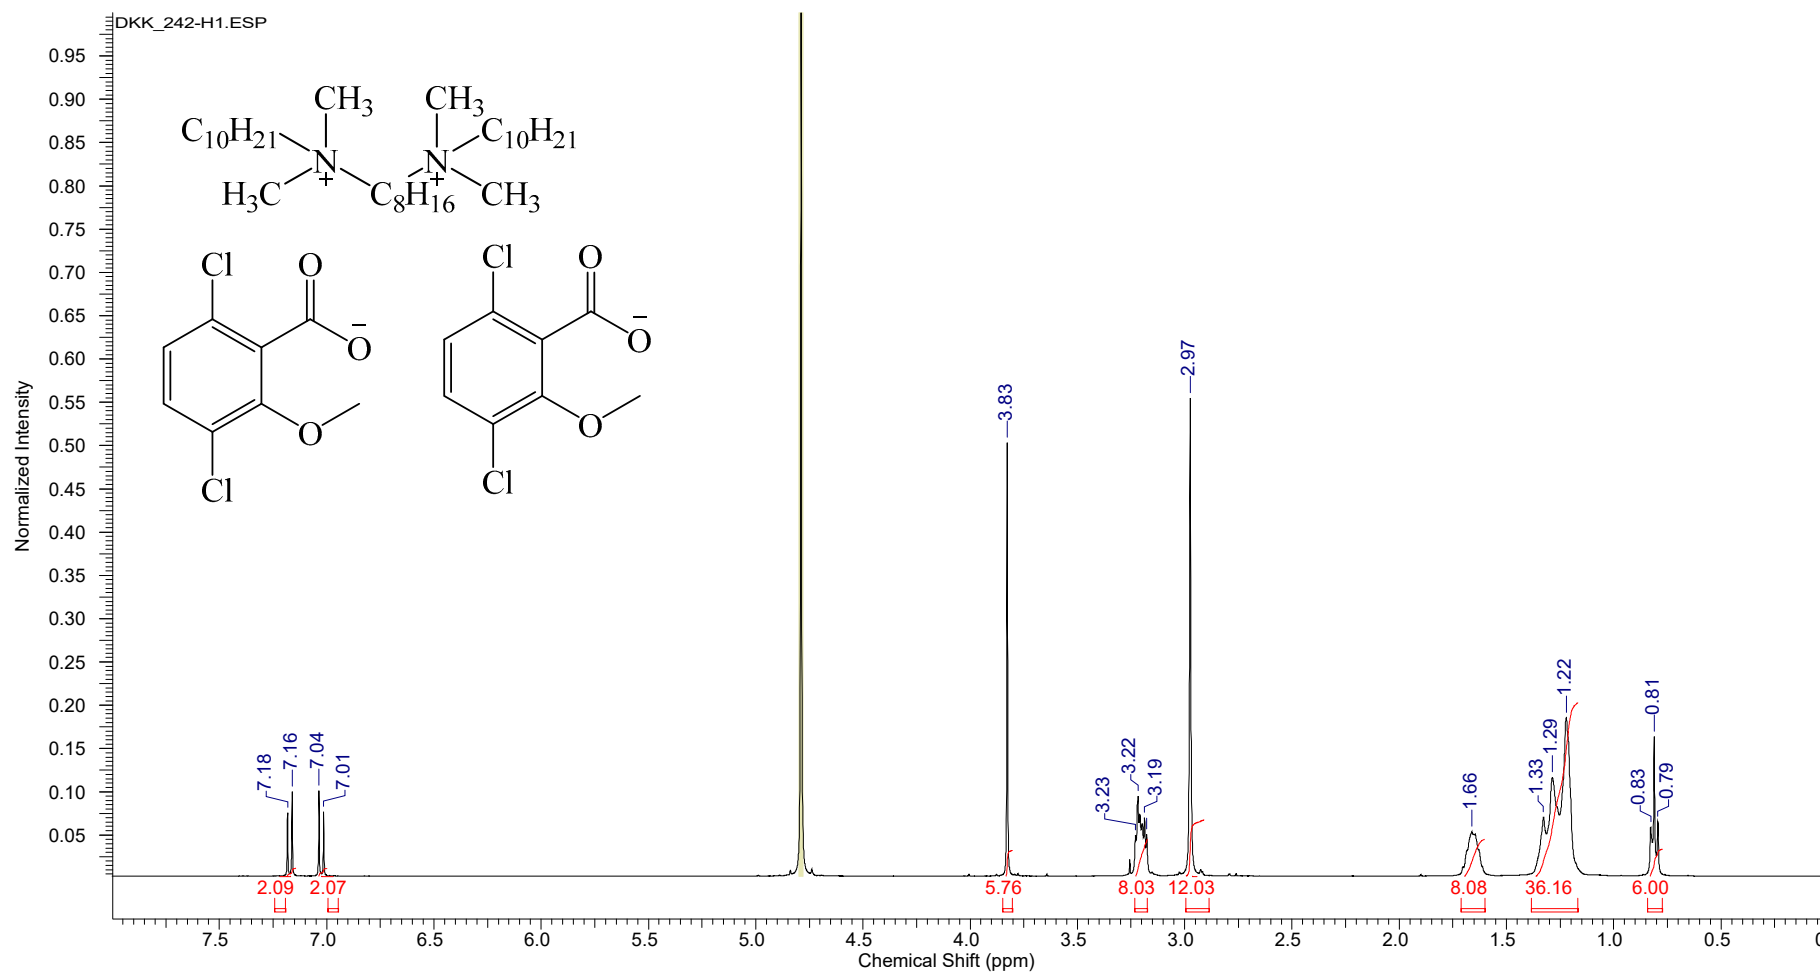

$\delta_{\text{H}}$  (METHANOL- $d_4$ ): 7.18 (2H, d,  $J=9$  Hz), 7.04 (2H, d,  $J=9$  Hz), 3.83 (6H, s), 3.19 - 3.23 (8H, m), 2.97 (12H, s), 1.66 (8H, m), 1.22 - 1.33 (36H, m), 0.79 - 0.83 (6H, m).

**Figure S9.**  $^1\text{H}$  NMR spectrum of octamethylene-1,8-bis(decyldimethylammonium) di[(3,6-dichloro-2-methoxy)benzoate] (5)

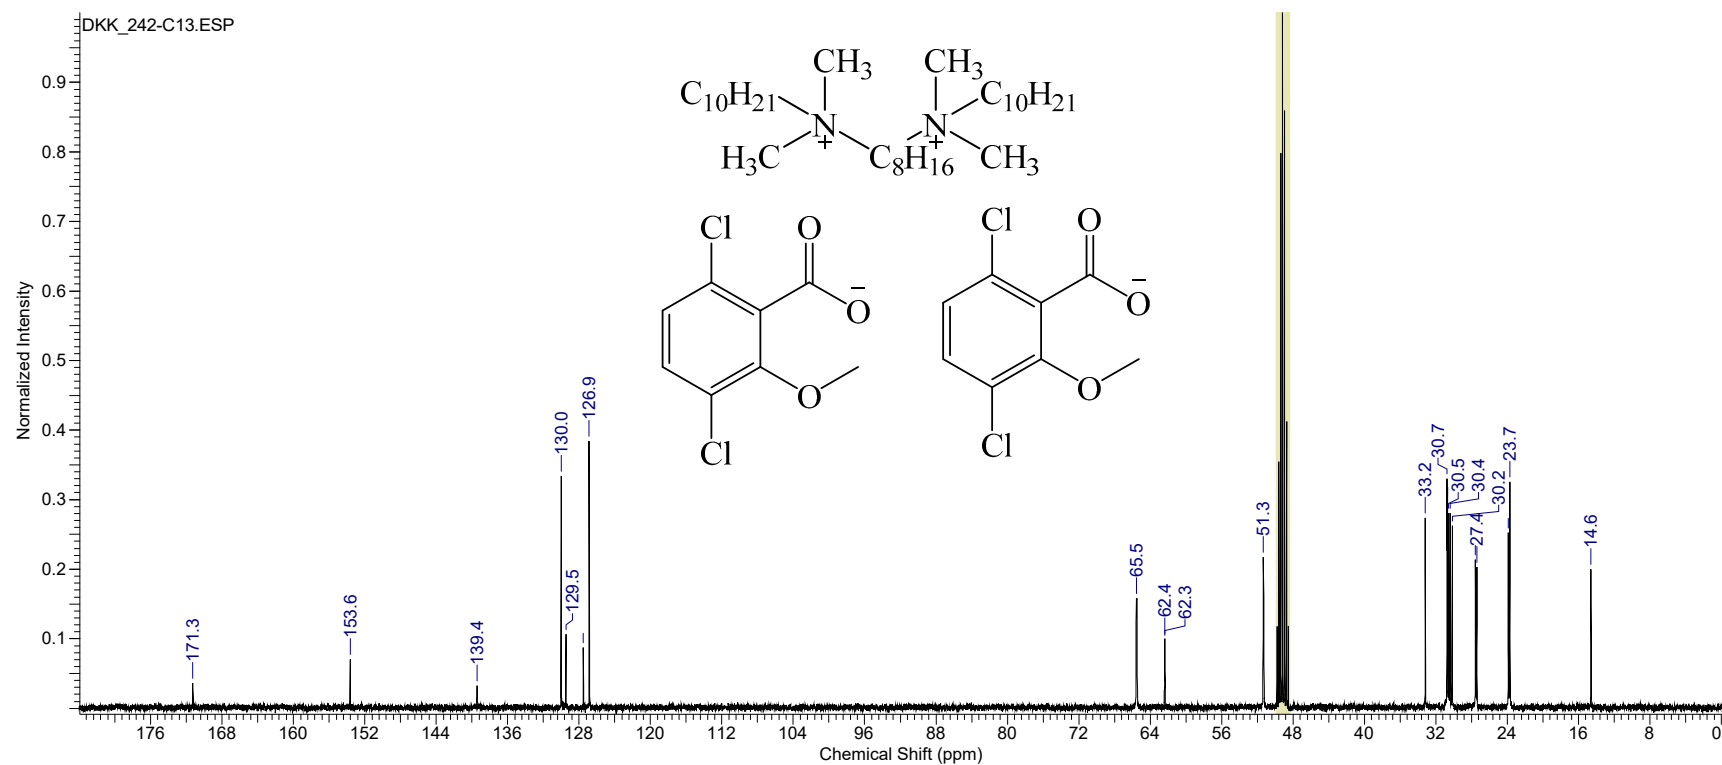

$\delta_c$  (METHANOL- $d_4$ ): 171.3 (2C), 153.6 (2C), 139.4 (2C), 130.0 (2C), 129.5 (2C), 127.5 (2C), 126.9 (2C), 65.5 (2C), 62.4 (2C), 62.3 (2C), 51.3 (4C), 33.2 (2C), 30.7 (2C), 30.5 (2C), 30.4 (2C), 30.2 (4C), 27.5 (2C), 27.4 (2C), 23.9 (4C), 23.7 (2C), 14.6 (2C).

**Figure S10.**  $^{13}\text{C}$  NMR spectrum of octamethylene-1,8-bis(decyldimethylammonium) di[(3,6-dichloro-2-methoxy)benzoate] (5)

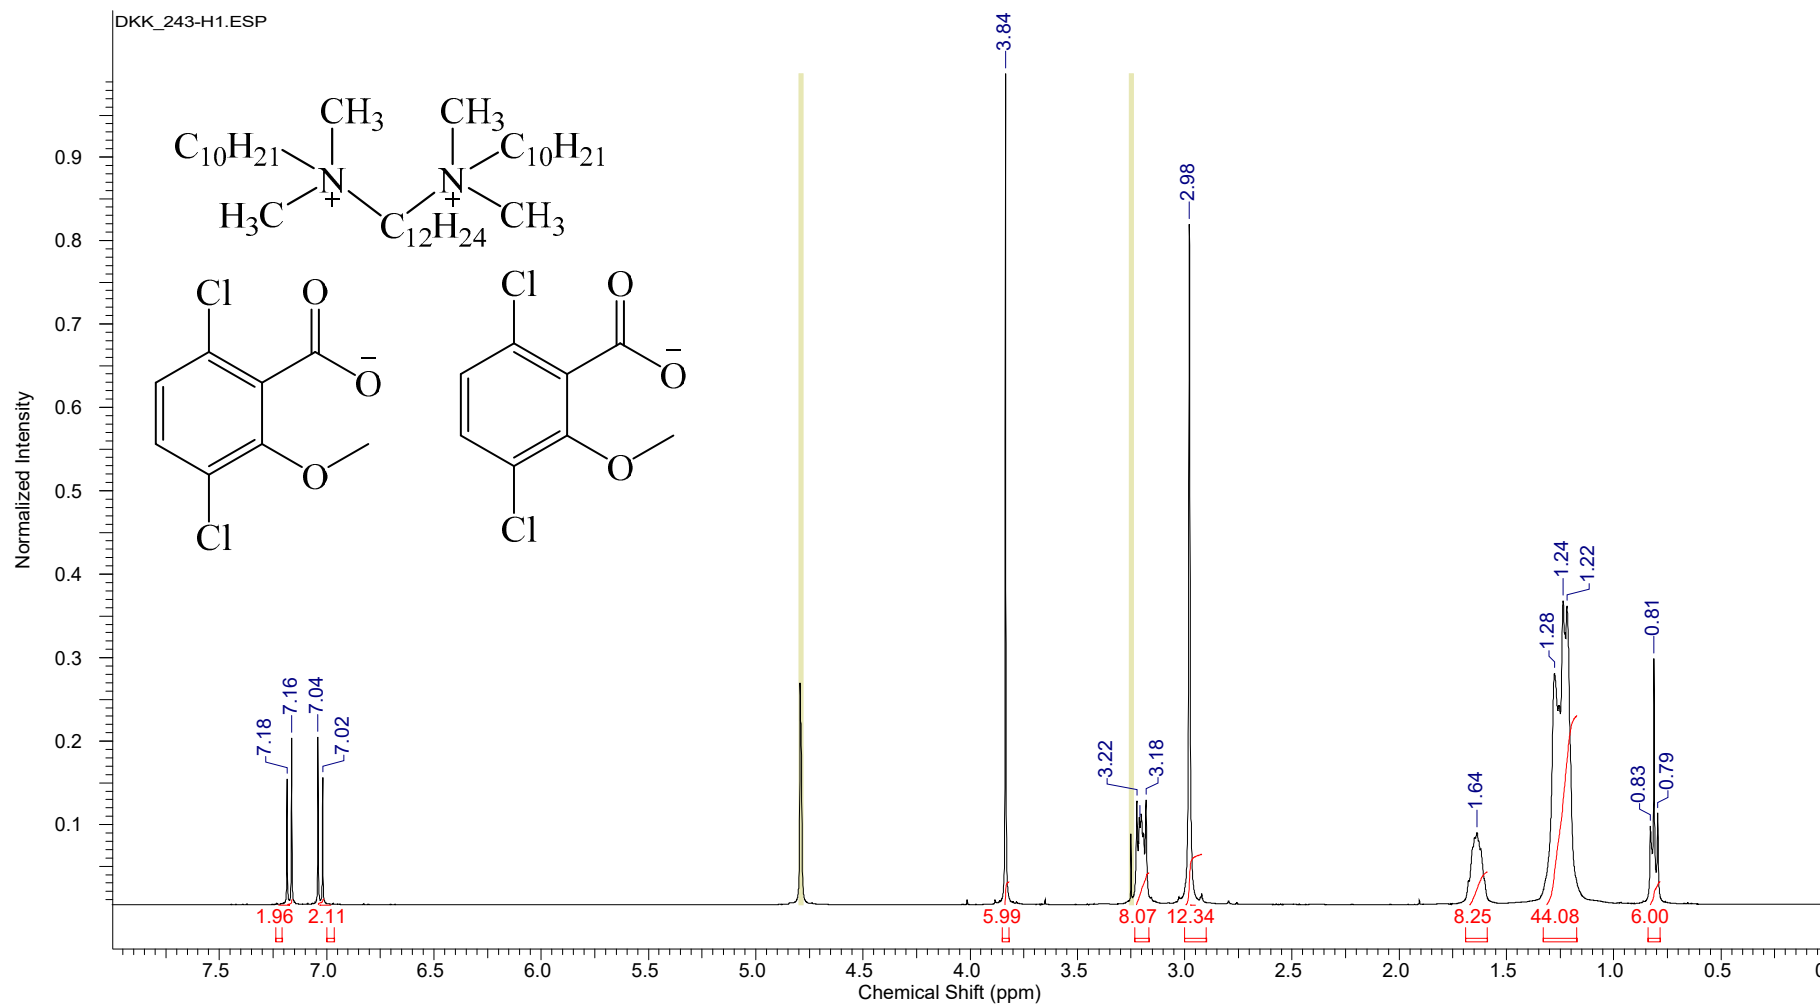

$\delta_H$  (METHANOL- $d_4$ ): 7.18 (2H, d,  $J=9$  Hz), 7.04 (2H, d,  $J=9$  Hz), 3.84 (6H, s), 3.18 - 3.22 (8H, m), 2.98 (12H, s), 1.64 (8H, m), 1.22 - 1.28 (44H, m), 0.79 - 0.83 (6H, m).

**Figure S11.**  $^1H$  NMR spectrum of dodecamethylene-1,12-bis(decyldimethylammonium) di[(3,6-dichloro-2-methoxy)benzoate] (**6**)

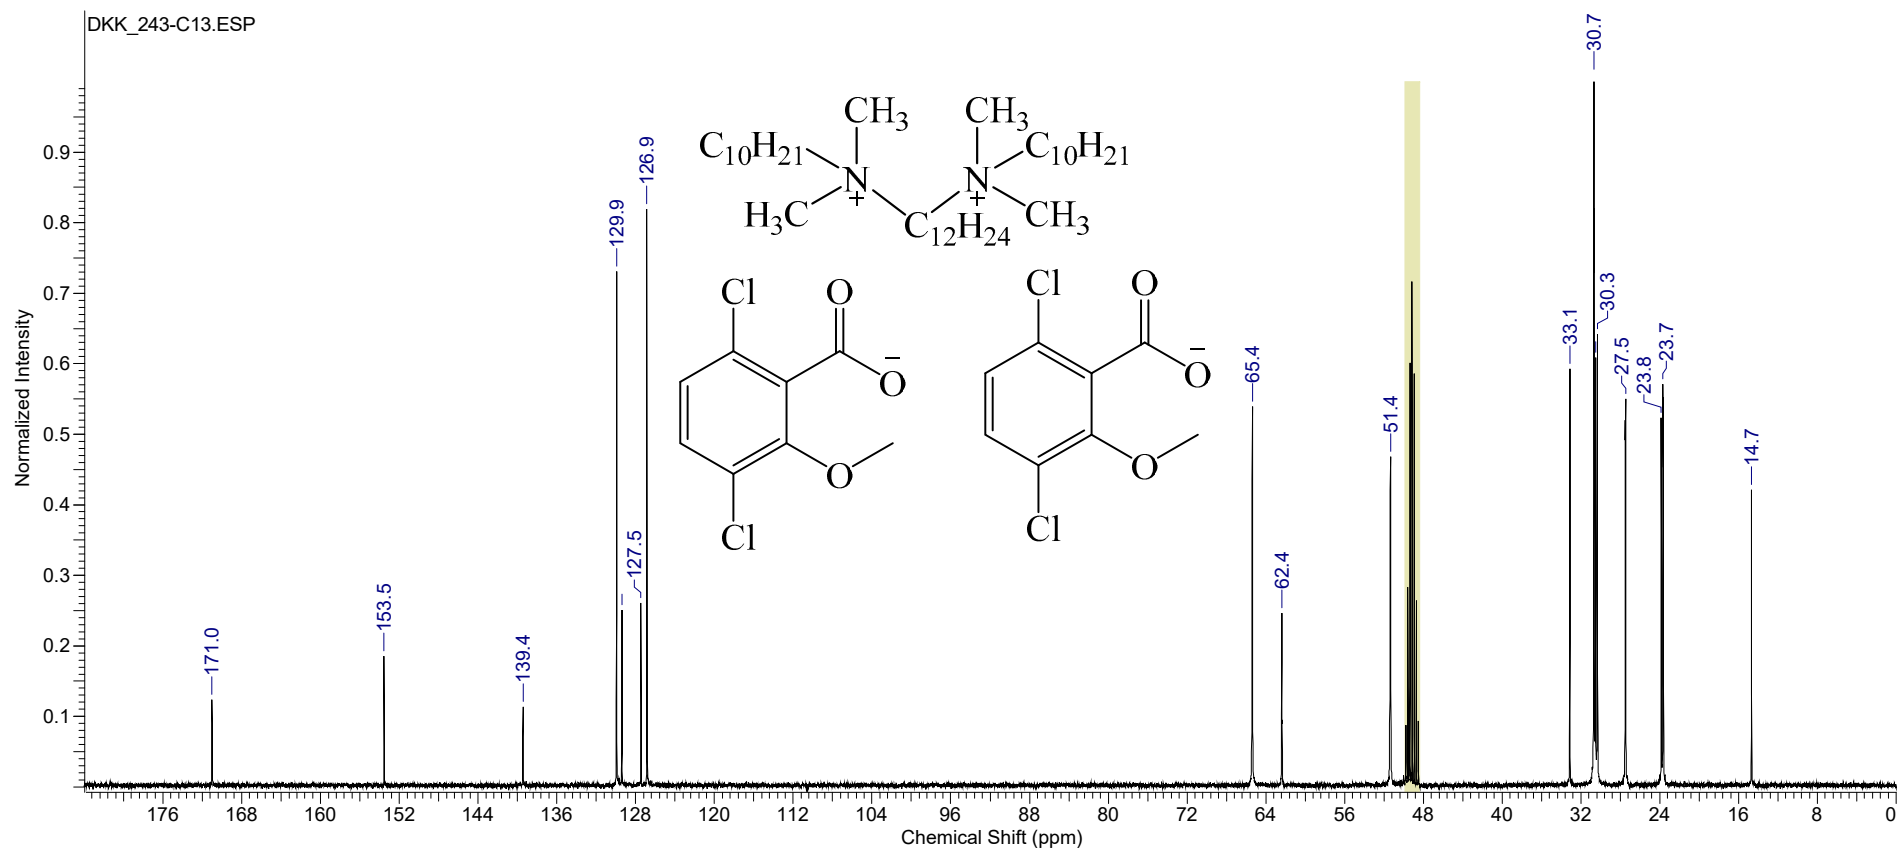

$\delta_c$  (METHANOL- $d_4$ ): 171.0 (2C), 153.5 (2C), 139.4 (2C), 129.9 (2C), 129.4 (2C), 127.5 (2C), 126.9 (2C), 65.4 (4C), 62.4 (2C), 51.4 (4C), 33.1 (2C), 30.7 (4C), 30.5 (4C), 30.3 (2C), 30.3 (4C), 27.5 (4C), 23.8 (4C), 23.7 (2C), 14.6 (2C).

**Figure S12.**  $^{13}\text{C}$  NMR spectrum of dodecamethylene-1,12-bis(decyldimethylammonium) di[(3,6-dichloro-2-methoxy)benzoate] (6)

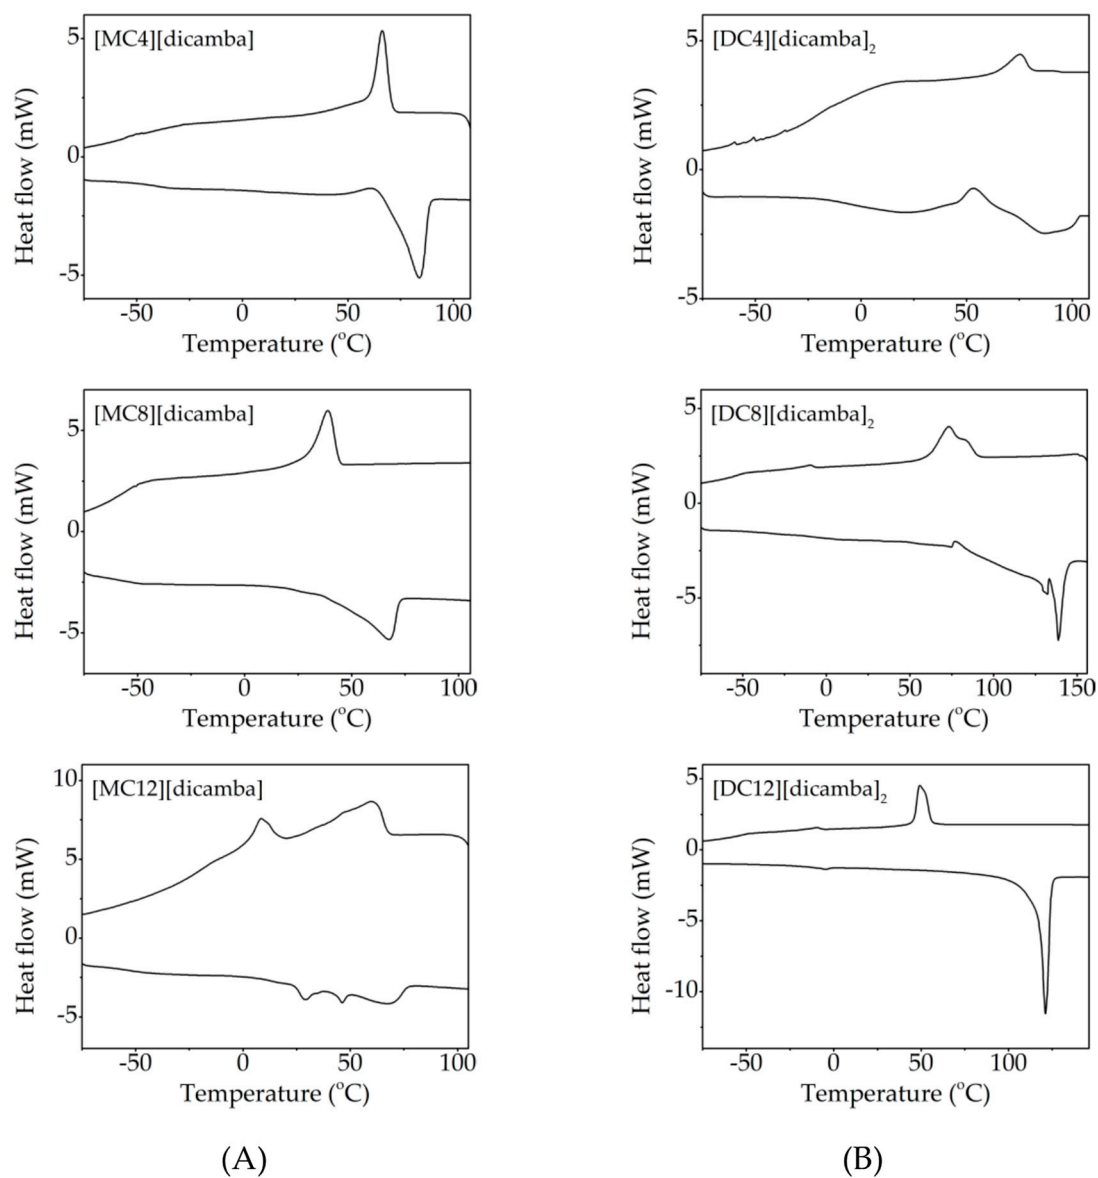

**Figure S13.** DSC thermograms of the monocationic (A) and dicationic (B) compounds with (3,6 dichloro-2-methoxy)benzoate anion

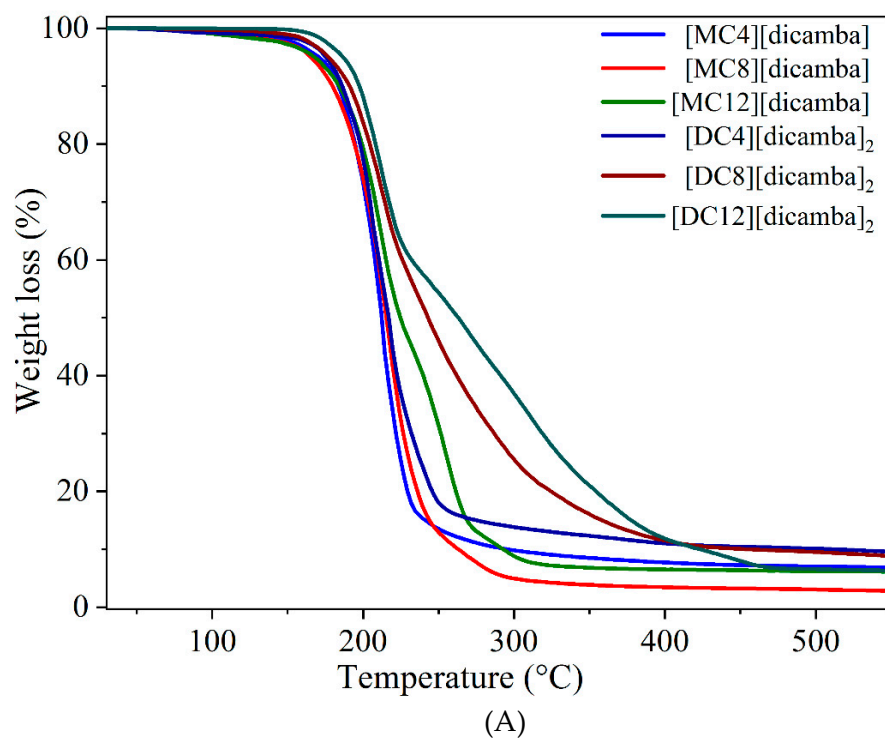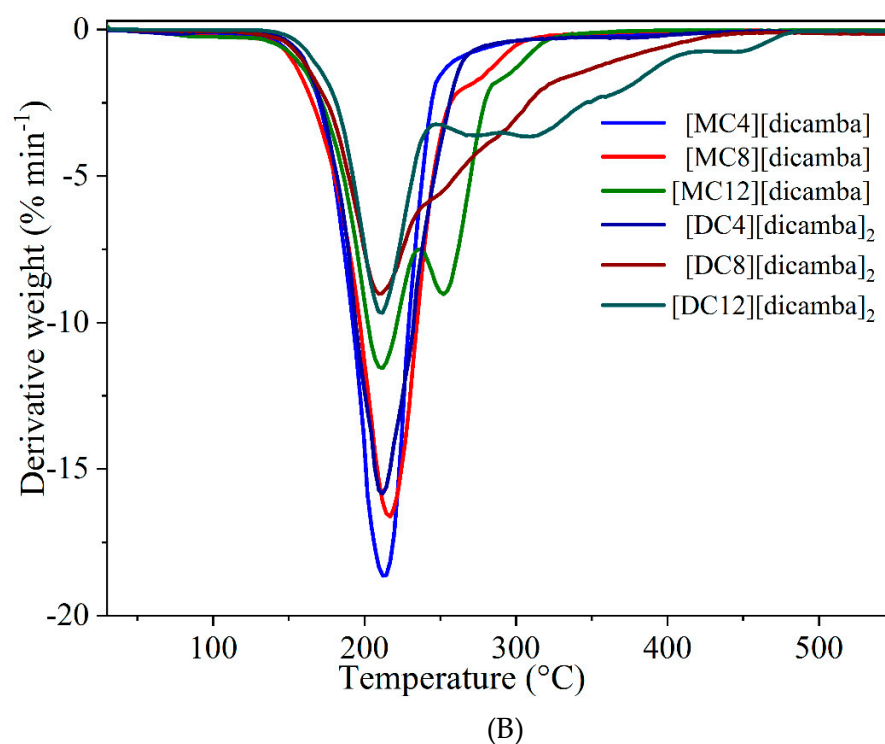

**Figure S14.** (A) TG and (B) DTG curves for investigated compounds

**Table S1.** Contact angle values of compounds (biological surface)

| Abbreviation                 | WINTER RAPESEED |         |         |
|------------------------------|-----------------|---------|---------|
|                              | CA (°)          |         |         |
|                              | 5 (°C)          | 15 (°C) | 25 (°C) |
| [MC4][dicamba]               | 63.32           | 57.67   | 57.32   |
| [MC8][dicamba]               | 54.23           | 52.30   | 49.74   |
| [MC12][dicamba]              | 50.69           | 47.50   | 46.64   |
| [DC4][dicamba] <sub>2</sub>  | 60.32           | 56.67   | 52.32   |
| [DC8][dicamba] <sub>2</sub>  | 52.10           | 50.34   | 47.12   |
| [DC12][dicamba] <sub>2</sub> | 51.64           | 44.54   | 42.23   |

  

| Abbreviation                 | COMMON WHEAT |         |         |
|------------------------------|--------------|---------|---------|
|                              | CA (°)       |         |         |
|                              | 5 (°C)       | 15 (°C) | 25 (°C) |
| [MC4][dicamba]               | 83.43        | 82.00   | 80.00   |
| [MC8][dicamba]               | 79.21        | 77.21   | 76.21   |
| [MC12][dicamba]              | 65.34        | 63.34   | 61.34   |
| [DC4][dicamba] <sub>2</sub>  | 78.43        | 83.12   | 74.34   |
| [DC8][dicamba] <sub>2</sub>  | 72.34        | 75.24   | 70.76   |
| [DC12][dicamba] <sub>2</sub> | 64.32        | 68.23   | 60.65   |

  

| Abbreviation                 | CORNFLOWER |         |         |
|------------------------------|------------|---------|---------|
|                              | CA (°)     |         |         |
|                              | 5 (°C)     | 15 (°C) | 25 (°C) |
| [MC4][dicamba]               | 65.85      | 56.67   | 52.32   |
| [MC8][dicamba]               | 59.84      | 54.25   | 49.74   |
| [MC12][dicamba]              | 45.28      | 42.26   | 40.64   |
| [DC4][dicamba] <sub>2</sub>  | 60.76      | 51.98   | 48.11   |
| [DC8][dicamba] <sub>2</sub>  | 56.98      | 47.76   | 46.23   |
| [DC12][dicamba] <sub>2</sub> | 40.12      | 35.65   | 39.12   |

  

| Abbreviation                 | WHITE MUSTARD |         |         |
|------------------------------|---------------|---------|---------|
|                              | CA (°)        |         |         |
|                              | 5 (°C)        | 15 (°C) | 25 (°C) |
| [MC4][dicamba]               | 62.76         | 59.23   | 54.77   |
| [MC8][dicamba]               | 55.23         | 52.02   | 45.08   |
| [MC12][dicamba]              | 49.99         | 49.02   | 41.85   |
| [DC4][dicamba] <sub>2</sub>  | 58.76         | 56.23   | 51.87   |
| [DC8][dicamba] <sub>2</sub>  | 48.23         | 49.12   | 42.08   |
| [DC12][dicamba] <sub>2</sub> | 45.12         | 44.12   | 38.65   |

**Table S2.** Contact angle values of compounds (membrane)

| Abbreviation                 | CA (°) |
|------------------------------|--------|
| [MC4][dicamba]               | 44.00  |
| [MC8][dicamba]               | 37.02  |
| [MC12][dicamba]              | 36.18  |
| [DC4][dicamba] <sub>2</sub>  | 42.39  |
| [DC8][dicamba] <sub>2</sub>  | 38.28  |
| [DC12][dicamba] <sub>2</sub> | 38.21  |

Equations necessary to determine parameters related to surface activity.

Gibbs energy ( $\Delta G^0_{\text{ads}}$ ) which characterizes the interactions between the bulk phase and the surface phase:

$$\Delta G^0_{\text{ads}} = -RT \ln a$$

where:

R is gas constant,

T is absolute temperature.

The a value is a parameter of the Szyszkowski equation:

$$\gamma = \gamma_0 [1 - b \ln \left( \frac{c}{a} + 1 \right)]$$

where:

$\gamma_0$  is the surface tension of the solvent.

Surface excess concentrations ( $\Gamma_{\text{max}}$ ) were calculated from the slope of the linear portion of the  $\gamma$ -log C plots (Fig. 4) using the Gibbs isotherm:

$$\Gamma_{\text{max}} = -\frac{1}{RT} \cdot \frac{d\gamma}{d(\ln C)}$$

where:

R is gas constant,

T is absolute temperature,

C is concentration of salts.



From  $\Gamma_{\max}$  the minimum surface occupied by a molecule at the interface  $A_{\min}$  can be calculated from equation:

$$A_{\min} = \frac{1}{\Gamma_{\max} N_A}$$

where:

$N_A$  is the Avogadro number.

Surface pressure at the CMC ( $\Pi_{\text{CMC}}$ ) can be calculated from equation:

$$\pi_{\text{CMC}} = \gamma_0 - \gamma_{\text{CMC}}$$

where:

$\gamma_0$  is surface tension of pure water which equals  $72.8 \text{ mN m}^{-1}$  (at under measurement conditions).

Adsorption efficiency ( $\text{pC}_{20}$ ):

$$\text{pC}_{20} = -\log C_{20}$$
